# Supplementary material for: Ultrasound-Responsive Liposomes for Targeted Drug Delivery Combined with Focused Ultrasound
Source: MDPI journal article supplement (doi:10.3390/pharmaceutics14071314), 2022-06-21

*<Supporting information>*

# Ultrasound-responsive liposomes for targeted drug delivery combined with focused ultrasound

Yoon-Seok Kim, Min Jung Ko, Hyungwon Moon, Wonchul Sim, Ae shin Cho, Gio Gil and Hyun Ryoung Kim \*

R&D center, IMGT Co., Ltd, 172, Dolma-ro, Bundang-gu, Seongnam-si, Gyeonggi-do, Republic of Korea

\* Correspondence: [hyunryoung.kim@nanoimgt.com](mailto:hyunryoung.kim@nanoimgt.com)

**Keywords:** ultrasound-responsive liposome; liposomal doxorubicin; stimuli-triggered drug release; high-intensity focused ultrasound; triple negative breast cancer

**Figure S1.** (a) Doxorubicin release ratio of IMP301 dependent on the temperature, (b) simulation of temperature increases dependent on the focused ultrasound condition.

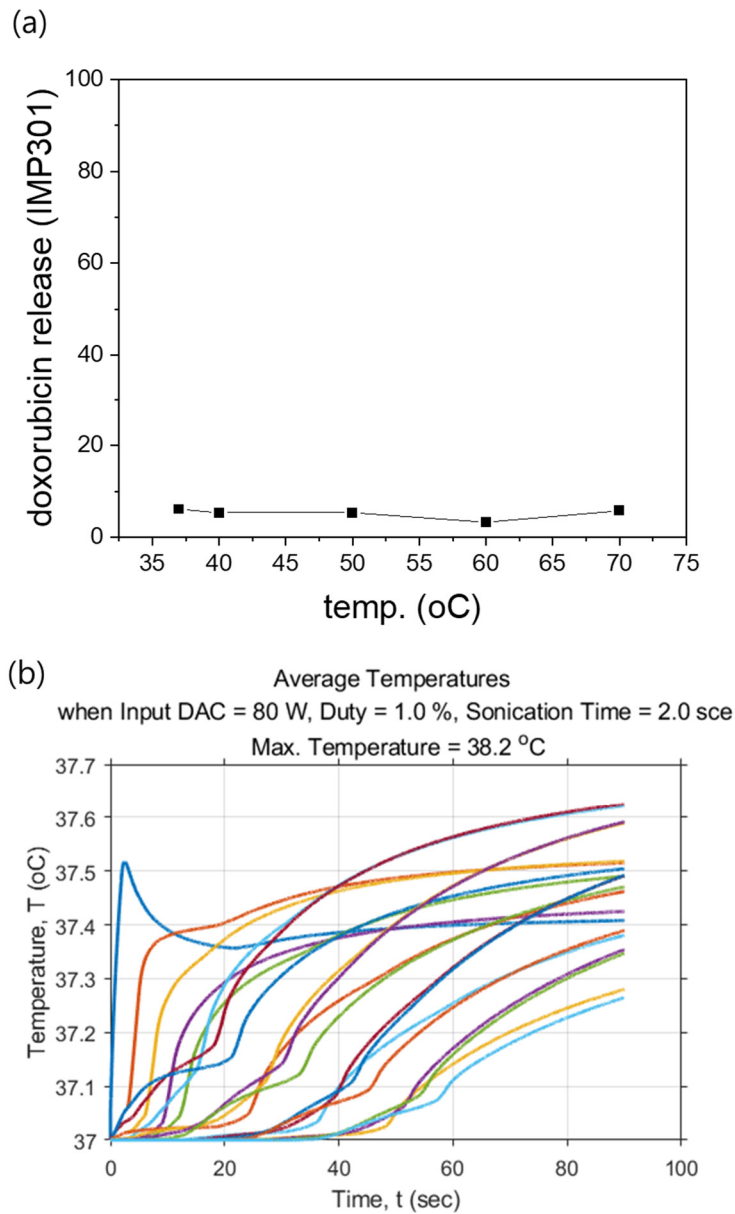

| Time(sec) |    | 2    | 4    | 6    | 8    | 10   | 12   | 14   | 16   | 18   | 20   | 22   | 24   | 26   | 28   | 30   |
|-----------|----|------|------|------|------|------|------|------|------|------|------|------|------|------|------|------|
| Duty      | 1% | 37.6 | 38.0 | 38.2 | 38.4 | 38.6 | 38.7 | 38.8 | 38.9 | 39.0 | 39.1 | 39.1 | 39.2 | 39.2 | 39.3 | 39.3 |
|           | 2% | 38.1 | 38.7 | 39.1 | 39.5 | 39.8 | 40.0 | 40.2 | 40.4 | 40.6 | 40.7 | 40.9 | 41.0 | 41.1 | 41.2 | 41.3 |
| Time(sec) |    | 32   | 34   | 36   | 38   | 40   | 42   | 44   | 46   | 48   | 50   | 52   | 54   | 56   | 58   | 60   |
| Duty      | 1% | 39.4 | 39.4 | 39.5 | 39.5 | 39.5 | 39.6 | 39.6 | 39.6 | 39.7 | 39.7 | 39.7 | 39.7 | 39.8 | 39.8 | 39.8 |
|           | 2% | 41.4 | 41.5 | 41.6 | 41.6 | 41.7 | 41.8 | 41.8 | 41.9 | 42.0 | 42.0 | 42.1 | 42.1 | 42.2 | 42.2 | 42.2 |

**Figure S2.** Population of free DOX to heart at 2h of post administration of DOX, DOXIL and IMP301.

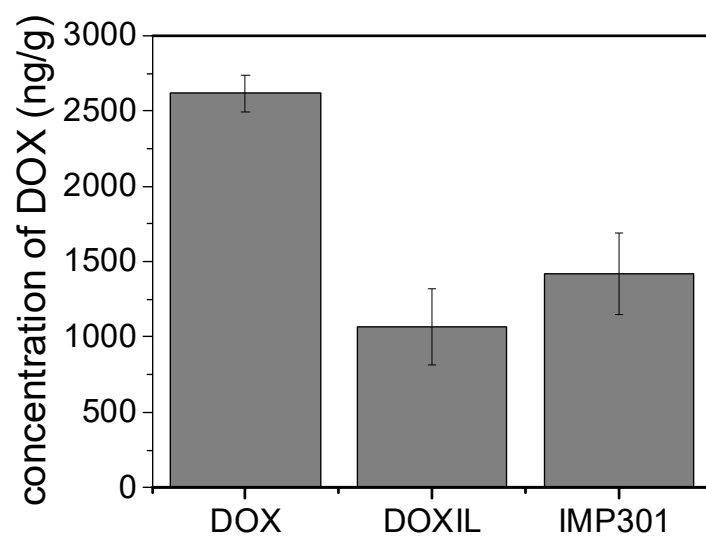

Supplement: s1 [file s1]
